# Supplementary material
Source: PubMed Central journal article supplement (PMC2288732)

**A**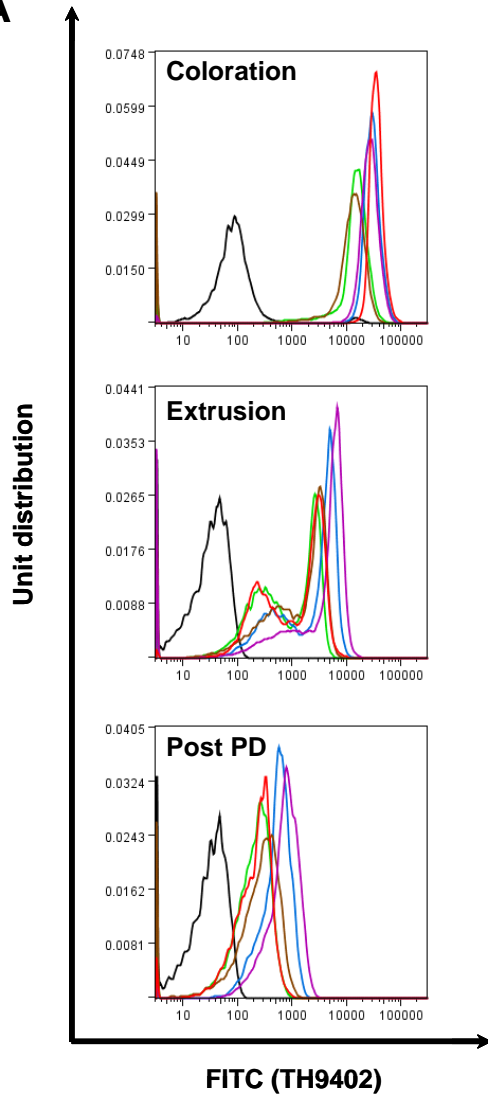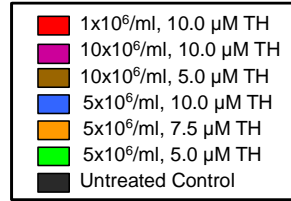**B**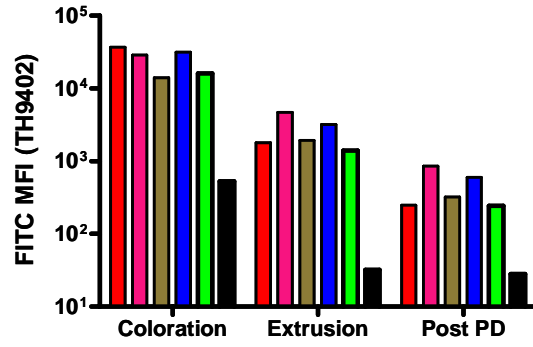**C**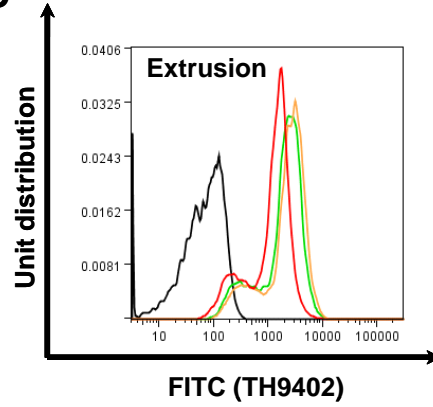

Supplement: blood_blood-2007-08-104471_1.pdf [file blood_blood-2007-08-104471_1.pdf]
